# Supplementary material
Source: PubMed Central journal article supplement (PMC8551684)
Supplement: mmc1.pdf [file mmc1.pdf]

# THE LANCET

## Global Health

### Supplementary appendix

This appendix formed part of the original submission and has been peer reviewed. We post it as supplied by the authors.

Supplement to: Lalwani P, Araujo-Castillo RV, Ganoza CA, et al. High anti-SARS-CoV-2 antibody seroconversion rates before the second wave in Manaus, Brazil, and the protective effect of social behaviour measures: results from the prospective DETECTCoV-19 cohort. *Lancet Glob Health* 2021; **9**: e1508–16.

## **Appendix contents**

Figure S1

Figure S2

Table S1

Table S2

Table S3

Table S4

Table S5

Table S6

Table S7

Table S8

Sensitivity analysis Table 1

Sensitivity analysis Table 2

Sensitivity analysis Table 3

Sensitivity analysis Table 4

Sensitivity analysis Table 5

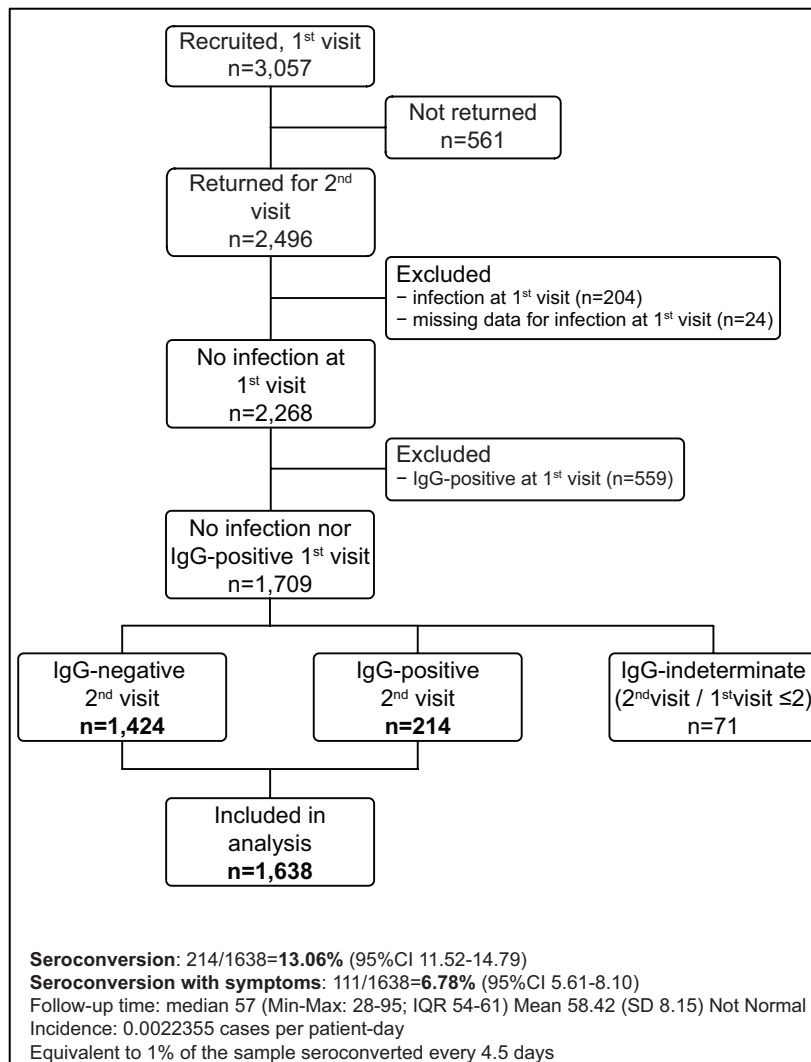

### Figure S1: Flowchart for calculating incidence of SARS-CoV-2 seroconversion

The DETECTCoV-19 cohort recruited 3046 participants as previously described<sup>6</sup>. Eleven individuals recruited and tested at baseline declined to further participate in the longitudinal study, but later consented to participate at the 2nd visit, thus were included in this analysis. Among a total of 3057 participants, 2496 returned for the 2nd visit. Table S6 details reasons for the loss to follow-up for 561 individuals. At both visits participants filled out an electronic questionnaire and donated a blood sample for SARS-CoV-2 serological testing.

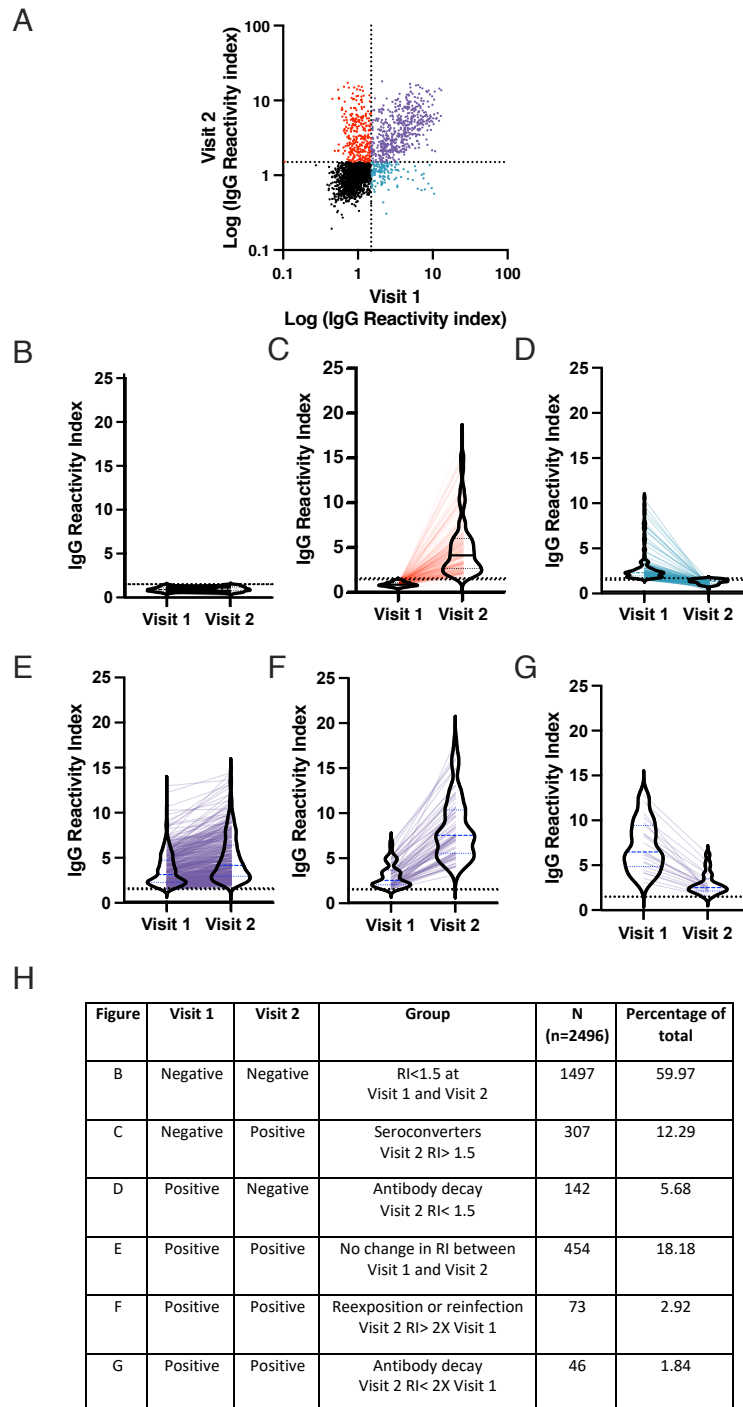

**Figure S2: Anti-SARS-CoV-2 nucleocapsid IgG reactivity profile of participants at visit 1 and 2.**

(A) Dot plot depicts the IgG anti-SARS-COV-2 nucleocapsid antibody reactivity index at visit 1 and visit 2. Each dot represents one patient and dotted line denotes assay cut-off. (B-G) Paired analysis of individual patient antibody reactivity index for each of the XY graph quadrant is depicted. (H) Summary of patient percentage and proportions for the different antibody trajectories as depicted in B.

**Table S1: Comparison of SARS-CoV-2 seroconversion rates using different case definitions in an adult population cohort from Manaus, Amazonas state of Brazil (N=1,638).**

| Case Definition* between 1 <sup>st</sup> and 2 <sup>nd</sup> Visit<br>n=1638 | Symptomatic Only |        | Symptomatic and Asymptomatic |         |
|------------------------------------------------------------------------------|------------------|--------|------------------------------|---------|
|                                                                              | n                | (%)    | n                            | (%)     |
| PCR only                                                                     | 48               | (2.93) | 48                           | (2.93)  |
| PCR and/or Antigen Test                                                      | 50               | (3.05) | 50                           | (3.05)  |
| PCR and/or Antigen and/or Serological Test                                   | 80               | (4.88) | 91                           | (5.56)  |
| Any Lab result and/or Clinical/Radiology Dx                                  | 89               | (5.43) | 99                           | (6.04)  |
| Seroconversion as per Study                                                  | 111              | (6.78) | 214                          | (13.06) |

\*Case definitions:

- PCR only: Patients meeting the selection criteria who had IgG ELISA reactivity index  $\leq 1.5$  at first visit, IgG ELISA reactivity index  $> 1.5$  at the second visit, and a reactivity index ratio (visit 2/visit 1)  $> 2$ , plus having a positive RT-PCR test.
- PCR and/or Antigen Test: Patients meeting the selection criteria who had IgG ELISA reactivity index  $\leq 1.5$  at first visit, IgG ELISA reactivity index  $> 1.5$  at the second visit, and a reactivity index ratio (visit 2/visit 1)  $> 2$ , plus having a positive RT-PCR test and/or a positive SARS-CoV-2 antigen test.
- PCR and/or Antigen and/or Serological Test: Patients meeting the selection criteria who had IgG ELISA reactivity index  $\leq 1.5$  at first visit, IgG ELISA reactivity index  $> 1.5$  at the second visit, and a reactivity index ratio (visit 2/visit 1)  $> 2$ , plus a positive PCR and/or Antigen and/or Serological Test (performed in other laboratory).
- Any Lab result and/or Clinical/Radiology Dx: Patients meeting the selection criteria who had IgG ELISA reactivity index  $\leq 1.5$  at first visit, IgG ELISA reactivity index  $> 1.5$  at the second visit, and a reactivity index ratio (visit 2/visit 1)  $> 2$ , plus any positive result (PCR, Antigen Test, external serological test) or a clinical/radiology assessment confirming COVID-19 infection.
- Seroconversion as per Study: Patients meeting the selection criteria who had IgG ELISA reactivity index  $\leq 1.5$  at first visit, IgG ELISA reactivity index  $> 1.5$  at the second visit, and a reactivity index ratio (visit 2/visit 1)  $> 2$ .

**Table S2: SARS-CoV-2 seroconversion according to demographics and health access characteristics of an adult population cohort from Manaus, Amazonas state of Brazil (n=1,638).**

| Characteristics <sup>1</sup> | Categories            | Total        | column % | IgG ELISA (-) -> (+) | Incidence row % | p value Chi2 test | RR*  | 95%CI     | p value | IRR** | 95%CI     | p value |
|------------------------------|-----------------------|--------------|----------|----------------------|-----------------|-------------------|------|-----------|---------|-------|-----------|---------|
| <b>Total</b>                 |                       | <b>1,638</b> |          | <b>214</b>           | <b>13.06</b>    |                   |      |           |         |       |           |         |
| <b>Demographics</b>          |                       |              |          |                      |                 |                   |      |           |         |       |           |         |
| Age                          | 18-29                 | 372          | 22.71    | 48                   | 12.90           | 0.915             | Ref  | -----     | -----   | Ref   | -----     | -----   |
|                              | 30-39                 | 420          | 25.64    | 56                   | 13.33           |                   | 1.03 | 0.68-1.57 | 0.878   | 1.00  | 0.66-1.51 | 0.990   |
|                              | 40-49                 | 354          | 21.61    | 48                   | 13.56           |                   | 1.05 | 0.81-1.36 | 0.703   | 1.02  | 0.80-1.31 | 0.865   |
|                              | 50-59                 | 292          | 17.83    | 40                   | 13.70           |                   | 1.06 | 0.69-1.63 | 0.786   | 1.02  | 0.66-1.57 | 0.924   |
|                              | >=60                  | 200          | 12.21    | 22                   | 11.00           |                   | 0.85 | 0.37-1.99 | 0.712   | 0.82  | 0.36-1.90 | 0.648   |
| Sex                          | F                     | 1,031        | 62.94    | 130                  | 12.61           | 0.476             | Ref  | -----     | -----   | Ref   | -----     | -----   |
|                              | M                     | 607          | 37.06    | 84                   | 13.84           |                   | 1.10 | 0.75-1.60 | 0.627   | 1.08  | 0.75-1.56 | 0.663   |
| Race                         | Mestizo               | 885          | 54.03    | 125                  | 14.12           | 0.290             | Ref  | -----     | -----   | Ref   | -----     | -----   |
|                              | White                 | 602          | 36.75    | 74                   | 12.29           |                   | 0.87 | 0.57-1.32 | 0.515   | 0.89  | 0.58-1.35 | 0.570   |
|                              | Black                 | 109          | 6.65     | 9                    | 8.26            |                   | 0.58 | 0.12-2.81 | 0.503   | 0.59  | 0.12-2.81 | 0.509   |
|                              | Indigenous            | 7            | 0.43     | 0                    | 0.00            |                   | NA   |           |         | NA    |           |         |
|                              | East-Asian            | 35           | 2.14     | 6                    | 17.14           |                   | 1.21 | 0.51-2.90 | 0.663   | 1.25  | 0.52-3.02 | 0.622   |
| Marital status               | Married/Stable Union  | 748          | 45.86    | 97                   | 12.97           | 0.593             | Ref  | -----     | -----   | Ref   | -----     | -----   |
|                              | Divorced/Widow        | 151          | 9.26     | 16                   | 10.61           |                   | 0.82 | 0.52-1.28 | 0.378   | 0.82  | 0.54-1.26 | 0.368   |
|                              | Single                | 732          | 44.88    | 100                  | 13.66           |                   | 1.05 | 0.80-1.38 | 0.708   | 1.08  | 0.83-1.41 | 0.568   |
| Sexual Orientation           | Heterosexual          | 1,441        | 89.78    | 182                  | 12.63           | 0.167             | Ref  | -----     | -----   | Ref   | -----     | -----   |
|                              | Homo-/Bi-/Transsexual | 164          | 10.22    | 27                   | 16.46           |                   | 1.30 | 0.84-2.02 | 0.234   | 1.33  | 0.86-2.04 | 0.195   |
| Occupation                   | Professional Higher   | 974          | 60.12    | 121                  | 12.42           | 0.667             | Ref  | -----     | -----   | Ref   | -----     | -----   |
|                              | Professional Middle   | 163          | 10.06    | 22                   | 13.50           |                   | 1.08 | 0.59-2.00 | 0.790   | 1.08  | 0.59-1.95 | 0.807   |
|                              | Worker/Informal       | 296          | 18.27    | 45                   | 15.20           |                   | 1.22 | 0.94-1.60 | 0.136   | 1.21  | 0.91-1.60 | 0.198   |
|                              | Unemployed            | 187          | 11.54    | 25                   | 13.37           |                   | 1.08 | 0.81-1.44 | 0.618   | 1.12  | 0.84-1.48 | 0.435   |
| Healthcare Job               | No                    | 1,380        | 84.25    | 179                  | 12.97           | 0.795             | Ref  | -----     | -----   | Ref   | -----     | -----   |
|                              | Yes                   | 258          | 15.75    | 35                   | 13.57           |                   | 1.05 | 0.73-1.50 | 0.807   | 1.00  | 0.69-1.45 | 1.000   |
| Family Income                | >6 minimum wages      | 731          | 45.57    | 96                   | 13.13           | 0.713             | Ref  | -----     | -----   | Ref   | -----     | -----   |
|                              | 4-6 minimum wages     | 390          | 24.31    | 55                   | 14.10           |                   | 1.07 | 0.79-1.46 | 0.647   | 1.10  | 0.81-1.48 | 0.537   |
|                              | 0-3 minimum wages     | 483          | 30.11    | 59                   | 12.22           |                   | 0.93 | 0.77-1.13 | 0.466   | 0.95  | 0.78-1.16 | 0.603   |
| Housing                      | Apartment             | 550          | 33.78    | 71                   | 12.91           | 0.438             | Ref  | -----     | -----   | Ref   | -----     | -----   |
|                              | Condo/Conjugated      | 303          | 18.61    | 46                   | 15.18           |                   | 1.18 | 0.98-1.42 | 0.089   | 1.17  | 0.97-1.40 | 0.098   |
|                              | Detached house        | 775          | 47.60    | 95                   | 12.26           |                   | 0.95 | 0.71-1.27 | 0.724   | 0.95  | 0.71-1.27 | 0.717   |

|                              |                |       |       |     |       |              |      |           |       |      |           |       |
|------------------------------|----------------|-------|-------|-----|-------|--------------|------|-----------|-------|------|-----------|-------|
| Number Adults in residence   | 1              | 156   | 9.59  | 22  | 14.10 | 0.883        | Ref  | -----     | ----- | Ref  | -----     | ----- |
|                              | 2              | 633   | 38.91 | 86  | 13.59 |              | 0.96 | 0.65-1.43 | 0.852 | 0.94 | 0.64-1.39 | 0.758 |
|                              | 3              | 419   | 25.75 | 53  | 12.65 |              | 0.90 | 0.59-1.37 | 0.614 | 0.90 | 0.60-1.36 | 0.623 |
|                              | 4+             | 419   | 25.75 | 51  | 12.17 |              | 0.86 | 0.64-1.16 | 0.336 | 0.87 | 0.64-1.19 | 0.390 |
| Number Children in residence | 0              | 1,006 | 62.37 | 129 | 12.82 | 0.970        | Ref  | -----     | ----- | Ref  | -----     | ----- |
|                              | 1              | 395   | 24.49 | 52  | 13.16 |              | 1.03 | 0.74-1.42 | 0.873 | 1.01 | 0.72-1.41 | 0.950 |
|                              | 2              | 173   | 10.73 | 23  | 13.29 |              | 1.04 | 0.59-1.81 | 0.899 | 1.01 | 0.59-1.73 | 0.969 |
|                              | 3+             | 39    | 2.42  | 6   | 15.38 |              | 1.20 | 0.43-3.35 | 0.728 | 1.20 | 0.42-3.42 | 0.737 |
| Administrative zones         | Center-South   | 581   | 35.47 | 61  | 10.50 | <b>0.015</b> | NA   |           |       | NA   |           |       |
|                              | Center-West    | 148   | 9.04  | 24  | 16.22 |              | NA   |           |       | NA   |           |       |
|                              | East           | 163   | 9.95  | 22  | 13.50 |              | NA   |           |       | NA   |           |       |
|                              | North          | 274   | 16.73 | 28  | 10.22 |              | NA   |           |       | NA   |           |       |
|                              | West           | 169   | 10.32 | 33  | 19.53 |              | NA   |           |       | NA   |           |       |
|                              | South          | 303   | 18.50 | 46  | 15.18 |              | NA   |           |       | NA   |           |       |
| <b>HealthCare Access</b>     |                |       |       |     |       |              |      |           |       |      |           |       |
| Private Insurance            | No             | 609   | 37.20 | 89  | 14.61 | 0.154        | Ref  | -----     | ----- | Ref  | -----     | ----- |
|                              | Yes            | 1,028 | 62.80 | 125 | 12.16 |              | 0.83 | 0.59-1.18 | 0.302 | 0.83 | 0.59-1.17 | 0.295 |
| Influenza Vaccine            | Last time 2020 | 806   | 49.21 | 96  | 11.91 | 0.128        | Ref  | -----     | ----- | Ref  | -----     | ----- |
|                              | Last time 2019 | 371   | 22.65 | 62  | 16.71 |              | 1.40 | 0.98-2.01 | 0.065 | 1.41 | 0.98-2.01 | 0.064 |
|                              | Prior to 2019  | 306   | 18.68 | 38  | 12.42 |              | 1.04 | 0.66-1.64 | 0.857 | 1.04 | 0.66-1.66 | 0.861 |
|                              | Never          | 155   | 9.46  | 18  | 11.61 |              | 0.98 | 0.57-1.68 | 0.928 | 0.99 | 0.57-1.69 | 0.958 |

<sup>1</sup> Variables obtained at 1<sup>st</sup> Cohort Visit except when indicated.

\* Relative Risk (RR) using Poisson Regression with robust variance corrected by clusters.

\*\* Incidence Rate Ratio (IRR) using Poisson Regression considering follow-up time with robust variance corrected by clusters.

**Table S3: SARS-CoV-2 seroconversion according to COVID-19 risk factors and exposures in an adult population cohort from Manaus, Amazonas state of Brazil (n=1,638).**

| Characteristics <sup>1</sup>     | Variables           | Total        | Column % | IgG ELISA (-) -> (+) | Incidence %  | p value Chi2 test | RR**        | 95%CI            | p value          | IRR**<br>*  | 95%CI            | p value          |
|----------------------------------|---------------------|--------------|----------|----------------------|--------------|-------------------|-------------|------------------|------------------|-------------|------------------|------------------|
| <b>Total</b>                     |                     | <b>1,638</b> |          | <b>214</b>           | <b>13.06</b> |                   |             |                  |                  |             |                  |                  |
| <b>Risk Factors</b>              |                     |              |          |                      |              |                   |             |                  |                  |             |                  |                  |
| Pregnancy                        | No                  | 1,022        | 99.13    | 130                  | 12.72        | 0.612*            | NA          |                  |                  | NA          |                  |                  |
|                                  | Yes                 | 9            | 0.87     | 0                    | 0.00         |                   |             |                  |                  |             |                  |                  |
| Comorbidities (any)              | No                  | 967          | 59.04    | 130                  | 13.44        | 0.585             | Ref         | -----            | -----            | Ref         | -----            | -----            |
|                                  | Yes                 | 671          | 40.96    | 84                   | 12.52        |                   | 0.93        | 0.66-1.31        | 0.683            | 0.94        | 0.66-1.33        | 0.723            |
| Which Comorbidities              | Chronic Respiratory | 152          | 9.28     | 25                   | 16.45        |                   | 1.22        | 0.83-1.80        | 0.308            | 1.22        | 0.82-1.82        | 0.323            |
|                                  | Diabetes            | 91           | 5.56     | 14                   | 15.38        |                   | 1.14        | 0.75-1.74        | 0.528            | 1.13        | 0.73-1.75        | 0.589            |
|                                  | Obesity             | 112          | 6.84     | 19                   | 16.96        |                   | 1.26        | 0.80-2.00        | 0.320            | 1.24        | 0.76-2.02        | 0.384            |
|                                  | Hypertension        | 250          | 15.26    | 28                   | 11.20        |                   | 0.83        | 0.59-1.17        | 0.297            | 0.84        | 0.59-1.19        | 0.331            |
|                                  | Cardiopathy         | 105          | 6.41     | 11                   | 10.48        |                   | 0.80        | 0.48-1.26        | 0.308            | 0.79        | 0.49-1.29        | 0.352            |
|                                  | Chronic Renal       | 30           | 1.83     | 6                    | 20.00        |                   | 1.49        | 0.98-2.26        | 0.063            | 1.46        | 0.97-2.22        | 0.071            |
|                                  | Immunological       | 30           | 1.83     | 6                    | 20.00        |                   | 1.49        | 0.70-3.15        | 0.299            | 1.53        | 0.74-3.16        | 0.256            |
|                                  | Cancer              | 8            | 0.49     | 0                    | 0.00         |                   | NA          |                  |                  | NA          |                  |                  |
| Preventive Self medication (any) | None/Vit/Homemade   | 1,359        | 82.97    | 168                  | 12.36        | 0.140             | Ref         | -----            | -----            | Ref         | -----            | -----            |
|                                  | Over the counter    | 110          | 6.72     | 20                   | 18.18        |                   | 1.47        | 0.90-2.40        | 0.122            | 1.47        | 0.89-2.44        | 0.132            |
|                                  | Prescription Meds   | 169          | 10.32    | 26                   | 15.38        |                   | 1.24        | 0.91-1.70        | 0.166            | 1.26        | 0.92-1.73        | 0.153            |
| Which medication                 | Nitazoxanide        | 17           | 1.04     | 2                    | 11.76        |                   | NA          |                  |                  | NA          |                  |                  |
|                                  | Azithromycin        | 53           | 3.24     | 10                   | 18.87        |                   | NA          |                  |                  | NA          |                  |                  |
|                                  | Hydroxy/Chloroquine | 4            | 0.24     | 1                    | 25.00        |                   | NA          |                  |                  | NA          |                  |                  |
|                                  | Corticosteroids     | 14           | 0.85     | 2                    | 14.29        |                   | NA          |                  |                  | NA          |                  |                  |
|                                  | Ivermectin          | 130          | 7.94     | 28                   | 13.08        |                   | NA          |                  |                  | NA          |                  |                  |
| <b>COVID-19 Exposure</b>         |                     |              |          |                      |              |                   |             |                  |                  |             |                  |                  |
| Social Distancing before August  | Never               | 29           | 1.79     | 7                    | 24.14        | 0.183             | Ref         | -----            | -----            | Ref         | -----            | -----            |
|                                  | Sometimes           | 417          | 25.74    | 51                   | 12.23        |                   | <b>0.51</b> | <b>0.36-0.72</b> | <b>&lt;0.001</b> | <b>0.50</b> | <b>0.35-0.72</b> | <b>&lt;0.001</b> |
|                                  | Frequently          | 1,174        | 72.47    | 153                  | 13.03        |                   | <b>0.54</b> | <b>0.33-0.88</b> | <b>0.014</b>     | <b>0.54</b> | <b>0.32-0.91</b> | <b>0.022</b>     |
| Flexibilization August           | No                  | 257          | 15.86    | 24                   | 9.34         | <b>0.056</b>      | Ref         | -----            | -----            | Ref         | -----            | -----            |
|                                  | Yes                 | 1,363        | 84.14    | 187                  | 13.72        |                   | <b>1.47</b> | <b>1.14-1.89</b> | <b>0.003</b>     | <b>1.50</b> | <b>1.16-1.94</b> | <b>0.002</b>     |
| Work before August               | On-site             | 479          | 29.55    | 79                   | 16.49        | <b>0.014</b>      | Ref         | -----            | -----            | Ref         | -----            | -----            |
|                                  | Remote Only         | 780          | 48.12    | 96                   | 12.31        |                   | <b>0.75</b> | <b>0.55-1.01</b> | <b>0.058</b>     | <b>0.75</b> | <b>0.55-1.01</b> | <b>0.059</b>     |
|                                  | NA                  | 362          | 22.33    | 36                   | 9.94         |                   |             |                  |                  |             |                  |                  |



|                                |                   |       |       |     |       |                   |             |                  |                  |             |                  |                  |
|--------------------------------|-------------------|-------|-------|-----|-------|-------------------|-------------|------------------|------------------|-------------|------------------|------------------|
| Work since August              | On-site           | 765   | 47·25 | 105 | 13·73 | 0·161             | Ref         | -----            | -----            | Ref         | -----            | -----            |
|                                | Only Remote       | 580   | 35·82 | 80  | 13·79 |                   | 1·00        | 0·84-1·20        | 0·957            | 0·98        | 0·82-1·18        | 0·867            |
|                                | NA                | 274   | 16·92 | 26  | 9·49  |                   |             |                  |                  |             |                  |                  |
| Family members with            | No                | 495   | 30·22 | 54  | 10·91 | 0·228             | Ref         | -----            | -----            | Ref         | -----            | -----            |
| COVID-19 (at 2 <sup>nd</sup> ) | Yes, alive        | 892   | 54·46 | 126 | 14·13 |                   | <b>1·29</b> | <b>1·11-1·51</b> | <b>0·001</b>     | <b>1·29</b> | <b>1·11-1·50</b> | <b>0·001</b>     |
|                                | Yes, deaths       | 251   | 15·32 | 34  | 13·55 |                   | 1·24        | 0·97-1·59        | 0·087            | 1·22        | 0·95-1·57        | 0·116            |
| Household members              | No                | 1,261 | 76·98 | 127 | 10·07 | <b>&lt;0·001*</b> | Ref         | -----            | -----            | Ref         | -----            | -----            |
| COVID-19 (at 2 <sup>nd</sup> ) | Yes, alive        | 371   | 22·65 | 85  | 22·91 |                   | <b>2·27</b> | <b>1·78-2·91</b> | <b>&lt;0·001</b> | <b>2·28</b> | <b>1·79-2·90</b> | <b>&lt;0·001</b> |
|                                | Yes, deaths       | 6     | 0·37  | 2   | 33·33 |                   | 3·31        | 0·86-12·7        | 0·081            | 3·39        | 0·83-13·8        | 0·089            |
| COVID-19 Contacts              | None              | 778   | 48·02 | 70  | 9·00  | <b>&lt;0·001</b>  | Ref         | -----            | -----            | Ref         | -----            | -----            |
| Since August                   | Yes, with Mask    | 604   | 37·28 | 93  | 15·40 |                   | <b>1·71</b> | <b>1·36-2·16</b> | <b>&lt;0·001</b> | <b>1·72</b> | <b>1·35-2·19</b> | <b>&lt;0·001</b> |
|                                | Yes, without Mask | 238   | 14·69 | 48  | 20·17 |                   | <b>2·24</b> | <b>1·93-2·61</b> | <b>&lt;0·001</b> | <b>2·28</b> | <b>1·93-2·68</b> | <b>&lt;0·001</b> |

<sup>1</sup> Variables obtained at 1<sup>st</sup> Cohort Visit except when indicated.

\* Fisher's Exact Test.

\*\* Relative Risk (RR) using Poisson Regression with robust variance corrected by clusters.

\*\*\* Incidence Rate Ratio (IRR) using Poisson Regression considering follow-up time with robust variance corrected by clusters.

**Table S4: SARS-CoV-2 seroconversion according to COVID-19 symptoms and diagnosis in an adult population cohort from Manaus, Amazonas state of Brazil (n=1,638).**

| Characteristics <sup>1</sup>                                   | Variables     | Total        | Column % | IgG ELISA (-) -> (+) | Incidence %  | p value Chi2 test | RR**        | 95%CI            | p value          | IRR**<br>*  | 95%CI            | p value          |
|----------------------------------------------------------------|---------------|--------------|----------|----------------------|--------------|-------------------|-------------|------------------|------------------|-------------|------------------|------------------|
| <b>Total</b>                                                   |               | <b>1,638</b> |          | <b>214</b>           | <b>13·06</b> |                   |             |                  |                  |             |                  |                  |
| <b>Symptoms</b>                                                |               |              |          |                      |              |                   |             |                  |                  |             |                  |                  |
| Symptoms (Between 1 <sup>st</sup> 2 <sup>nd</sup> visit)       | None          | 1,196        | 73·02    | 103                  | 8·61         | <b>&lt;0·001</b>  | Ref         | -----            | -----            | Ref         | -----            | -----            |
|                                                                | Flu-like      | 393          | 23·99    | 104                  | 26·46        |                   | <b>3·07</b> | <b>2·25-4·19</b> | <b>&lt;0·001</b> | <b>3·05</b> | <b>2·23-4·18</b> | <b>&lt;0·001</b> |
|                                                                | Others        | 49           | 2·99     | 7                    | 14·29        |                   | 1·66        | 0·67-4·14        | 0·277            | 1·68        | 0·67-4·23        | 0·271            |
| <b>COVID-19 Diagnosis</b>                                      |               |              |          |                      |              |                   |             |                  |                  |             |                  |                  |
| PCR (Between 1 <sup>st</sup> 2 <sup>nd</sup> visit)            | Not done      | 1,487        | 92·13    | 161                  | 10·83        | <b>&lt;0·001</b>  | Ref         | -----            | -----            | Ref         | -----            | -----            |
|                                                                | Yes, Negative | 79           | 4·89     | 11                   | 13·92        |                   | 1·29        | 0·85-1·96        | 0·240            | 1·27        | 0·83-1·95        | 0·269            |
|                                                                | Yes, Positive | 48           | 2·97     | 36                   | 75·00        |                   | <b>6·93</b> | <b>5·54-8·66</b> | <b>&lt;0·001</b> | <b>6·70</b> | <b>5·28-8·51</b> | <b>&lt;0·001</b> |
| Serology (Between 1 <sup>st</sup> 2 <sup>nd</sup> visit)       | Not done      | 1,030        | 63·74    | 116                  | 11·26        | <b>&lt;0·001</b>  | Ref         | -----            | -----            | Ref         | -----            | -----            |
|                                                                | Yes, Negative | 531          | 32·86    | 63                   | 11·86        |                   | 1·05        | 0·77-1·44        | 0·743            | 1·08        | 0·80-1·47        | 0·607            |
|                                                                | Yes, Positive | 55           | 3·40     | 32                   | 58·18        |                   | <b>5·17</b> | <b>3·31-8·06</b> | <b>&lt;0·001</b> | <b>5·02</b> | <b>3·25-7·75</b> | <b>&lt;0·001</b> |
| Antigenic Test (Between 1 <sup>st</sup> 2 <sup>nd</sup> visit) | Not done      | 1,088        | 98·64    | 124                  | 11·40        | <b>&lt;0·001*</b> | Ref         | -----            | -----            | Ref         | -----            | -----            |
|                                                                | Yes, Negative | 9            | 0·82     | 1                    | 11·11        |                   | 0·97        | 0·15-6·50        | 0·979            | 1·11        | 0·16-7·71        | 0·916            |
|                                                                | Yes, Positive | 6            | 0·54     | 6                    | 100·00       |                   | <b>8·77</b> | <b>6·61-11·7</b> | <b>&lt;0·001</b> | <b>8·90</b> | <b>6·60-12·0</b> | <b>&lt;0·001</b> |
| COVID-19 (Between 1 <sup>st</sup> 2 <sup>nd</sup> visit)       | No            | 1,538        | 93·95    | 151                  | 9·82         | <b>&lt;0·001</b>  | Ref         | -----            | -----            | Ref         | -----            | -----            |
|                                                                | Yes           | 99           | 6·05     | 63                   | 63·64        |                   | <b>6·48</b> | <b>4·24-9·90</b> | <b>&lt;0·001</b> | <b>6·28</b> | <b>4·08-9·68</b> | <b>&lt;0·001</b> |

<sup>1</sup> Variables obtained at 1<sup>st</sup> Cohort Visit except when indicated.

\* Fisher's Exact Test.

\*\* Relative Risk (RR) using Poisson Regression with robust variance corrected by clusters.

\*\*\* Incidence Rate Ratio (IRR) using Poisson Regression considering follow-up time with robust variance corrected by clusters.

**Table S5: Multivariate regression model for SARS-CoV-2 seroconversion in an adult population cohort from Manaus, Amazonas state of Brazil (n=1,638).**

| Characteristics <sup>1</sup>                       | Variables                | IRR*        | 95%CI            | p value          |
|----------------------------------------------------|--------------------------|-------------|------------------|------------------|
| Age                                                | 18-29                    | Ref         | -----            | -----            |
|                                                    | 30-39                    | 0.97        | 0.68-1.37        | 0.854            |
|                                                    | 40-49                    | 1.05        | 0.81-1.36        | 0.725            |
|                                                    | 50-59                    | 1.13        | 0.66-1.93        | 0.652            |
|                                                    | >=60                     | 1.17        | 0.55-2.51        | 0.683            |
| Sex                                                | F                        | Ref         | -----            | -----            |
|                                                    | M                        | 1.13        | 0.82-1.56        | 0.458            |
| Social Distancing before August                    | Never                    | Ref         | -----            | -----            |
|                                                    | Sometimes                | 0.80        | 0.53-1.21        | 0.285            |
|                                                    | Frequently               | 1.11        | 0.57-2.18        | 0.758            |
| SD Flexibilization since August                    | No                       | Ref         | -----            | -----            |
|                                                    | <b>Yes</b>               | <b>1.31</b> | <b>1.05-1.64</b> | <b>0.017</b>     |
| Motives Work before August                         | On-site                  | Ref         | -----            | -----            |
|                                                    | <b>Remote Only</b>       | <b>0.74</b> | <b>0.56-0.97</b> | <b>0.030</b>     |
|                                                    | NA                       |             |                  |                  |
| Household members with COVID-19 (2 <sup>nd</sup> ) | No                       | Ref         | -----            | -----            |
|                                                    | <b>Yes, alive</b>        | <b>1.49</b> | <b>1.21-1.83</b> | <b>&lt;0.001</b> |
|                                                    | Yes, deaths              | 2.22        | 0.68-7.27        | 0.186            |
| COVID-19 Contacts since August                     | None                     | Ref         | -----            | -----            |
|                                                    | Yes, with Mask           | 1.20        | 0.90-1.60        | 0.219            |
|                                                    | <b>Yes, without Mask</b> | <b>1.25</b> | <b>1.09-1.45</b> | <b>0.002</b>     |
| Symptoms since August                              | None                     | Ref         | -----            | -----            |
|                                                    | <b>Flu-like</b>          | <b>1.79</b> | <b>1.23-2.59</b> | <b>0.002</b>     |
|                                                    | Others                   | 1.20        | 0.60-2.40        | 0.616            |
| COVID-19 Diagnosis since August                    | No                       | Ref         | -----            | -----            |
|                                                    | <b>Yes</b>               | <b>3.57</b> | <b>2.27-5.63</b> | <b>&lt;0.001</b> |

<sup>1</sup> Variables obtained at 1st Cohort Visit except when indicated.

\* Incidence Rate Ratio (IRR) using Poisson Regression considering follow-up time with robust variance corrected by clusters, and adjusted per all model variables.

**Table S6: Reasons for loss to follow-up at 2<sup>nd</sup> visit**

| <b>Reason/Motive</b>                                                     | <b>n</b>   |
|--------------------------------------------------------------------------|------------|
| Change of domicile Municipality                                          | 11         |
| Financial problems with travel / transportation to the collection center | 17         |
| Not in Manaus during the collection period (travelling outside Manaus)   | 67         |
| Illness                                                                  | 29         |
| Work or family responsibilities                                          | 88         |
| No reason                                                                | 63         |
| Personal reasons                                                         | 66         |
| Did not respond to follow-up request                                     | 144        |
| Death from other causes (COVID-19 RT-PCR Negative)                       | 2          |
| Study withdrawal for personal reasons                                    | 6          |
| Unreachable (E-mail, telephone, and phone messaging)                     | 68         |
| <b>Total</b>                                                             | <b>561</b> |

**Table S7: Missing percentage per each variable used in the seroconversion analysis (people who returned for a 2<sup>nd</sup> visit and did not have prior infection or seropositivity at 1<sup>st</sup> visit) in an adult population cohort from Manaus, Amazonas state of Brazil (n=1,638).**

| <b>Variables</b>           | <b>Total</b> | <b>Missing %</b> |
|----------------------------|--------------|------------------|
| <b>Total</b>               | <b>1,638</b> |                  |
| <b>Demographics</b>        |              |                  |
| Age                        | 1,638        | 0·00%            |
| Sex                        | 1,638        | 0·00%            |
| Race                       | 1,638        | 0·00%            |
| Marital status             | 1,631        | 0·43%            |
| Sexual Orientation         | 1,605        | 2·01%            |
| Occupation                 | 1,620        | 1·10%            |
| Healthcare Job             | 1,638        | 0·00%            |
| Family Income              | 1,604        | 2·08%            |
| Housing                    | 1,628        | 0·61%            |
| Number Adults at home      | 1,627        | 0·67%            |
| Number Children at home    | 1,613        | 1·53%            |
| Administrative Zone        | 1,638        | 0·00%            |
| <b>HealthCare Access</b>   |              |                  |
| Private Insurance          | 1,637        | 0·06%            |
| Influenza Vaccine          | 1,638        | 0·00%            |
| <b>Risk Factors</b>        |              |                  |
| Pregnancy*                 | 1,031        | 0·00%            |
| Comorbidities (any)        | 1,638        | 0·00%            |
| Preventive Self Medication | 1,638        | 0·00%            |
| <b>COVID-19 Exposure</b>   |              |                  |
| Social Distancing          | 1,620        | 1·10%            |
| Flexibilization August     | 1,620        | 1·10%            |

|                                  |       |        |
|----------------------------------|-------|--------|
| Work before August               | 1,621 | 1·04%  |
| Work since August                | 1,619 | 1·16%  |
| Family members with COVID        | 1,638 | 0·00%  |
| Household members with COVID     | 1,638 | 0·00%  |
| COVID-19 Contacts since August   | 1,620 | 1·10%  |
| <b>Symptoms</b>                  |       |        |
| Symptoms (1st to 2nd visit)      | 1,638 | 0·00%  |
| <b>COVID-19 Diagnosis</b>        |       |        |
| PCR (Between 1st 2nd visit)      | 1,614 | 1·47%  |
| Serology (Between 1st 2nd visit) | 1,616 | 1·34%  |
| Antigenic Test                   | 1,103 | 32·66% |
| COVID-19 (Between                | 1,637 | 0·06%  |

\* Only women (n=1031)

**Table S8: STROBE statement**

|                           | Item No | Recommendation                                                                                                                                                                                    | Description and page number |
|---------------------------|---------|---------------------------------------------------------------------------------------------------------------------------------------------------------------------------------------------------|-----------------------------|
| <b>Title and abstract</b> | 1       | (a) Indicate the study’s design with a commonly used term in the title or the abstract                                                                                                            | 01                          |
|                           |         | (b) Provide in the abstract an informative and balanced summary of what was done and what was found                                                                                               | 03                          |
| <b>Introduction</b>       |         |                                                                                                                                                                                                   |                             |
| Background/rationale      | 2       | Explain the scientific background and rationale for the investigation being reported                                                                                                              | 05                          |
| Objectives                | 3       | State specific objectives, including any prespecified hypotheses                                                                                                                                  | 05                          |
| <b>Methods</b>            |         |                                                                                                                                                                                                   |                             |
| Study design              | 4       | Present key elements of study design early in the paper                                                                                                                                           | 05                          |
| Setting                   | 5       | Describe the setting, locations, and relevant dates, including periods of recruitment, exposure, follow-up, and data collection                                                                   | 05                          |
| Participants              | 6       | (a) Give the eligibility criteria, and the sources and methods of selection of participants. Describe methods of follow-up                                                                        | 05                          |
|                           |         | (b) For matched studies, give matching criteria and number of exposed and unexposed                                                                                                               | NA                          |
| Variables                 | 7       | Clearly define all outcomes, exposures, predictors, potential confounders, and effect modifiers. Give diagnostic criteria, if applicable                                                          | Methodology                 |
| Data sources/measurement  | 8*      | For each variable of interest, give sources of data and details of methods of assessment (measurement). Describe comparability of assessment methods if there is more than one group              | Methodology                 |
| Bias                      | 9       | Describe any efforts to address potential sources of bias                                                                                                                                         | Methodology                 |
| Study size                | 10      | Explain how the study size was arrived at                                                                                                                                                         | Methodology                 |
| Quantitative variables    | 11      | Explain how quantitative variables were handled in the analyses. If applicable, describe which groupings were chosen and why                                                                      | Methodology                 |
| Statistical methods       | 12      | (a) Describe all statistical methods, including those used to control for confounding                                                                                                             | Methodology                 |
|                           |         | (b) Describe any methods used to examine subgroups and interactions                                                                                                                               | Methodology                 |
|                           |         | (c) Explain how missing data were addressed                                                                                                                                                       | Methodology                 |
|                           |         | (d) If applicable, explain how loss to follow-up was addressed                                                                                                                                    | Methodology                 |
|                           |         | (e) Describe any sensitivity analyses                                                                                                                                                             | 7                           |
| <b>Results</b>            |         |                                                                                                                                                                                                   |                             |
| Participants              | 13*     | (a) Report numbers of individuals at each stage of study—eg numbers potentially eligible, examined for eligibility, confirmed eligible, included in the study, completing follow-up, and analysed | 07                          |
|                           |         | (b) Give reasons for non-participation at each stage                                                                                                                                              | 29                          |
|                           |         | (c) Consider use of a flow diagram                                                                                                                                                                | 19                          |
| Descriptive data          | 14*     | (a) Give characteristics of study participants (eg demographic, clinical, social) and information on exposures and potential confounders                                                          | 22-27                       |
|                           |         | (b) Indicate number of participants with missing data for each variable of interest                                                                                                               | 22-27                       |

|                          |     |                                                                                                                                                                                                              |            |
|--------------------------|-----|--------------------------------------------------------------------------------------------------------------------------------------------------------------------------------------------------------------|------------|
|                          |     | (c) Summarise follow-up time (eg, average and total amount)                                                                                                                                                  | 19, 22-27  |
| Outcome data             | 15* | Report numbers of outcome events or summary measures over time                                                                                                                                               | 22-27      |
| Main results             | 16  | (a) Give unadjusted estimates and, if applicable, confounder-adjusted estimates and their precision (eg, 95% confidence interval). Make clear which confounders were adjusted for and why they were included | 22-29      |
|                          |     | (b) Report category boundaries when continuous variables were categorized                                                                                                                                    | 22-29      |
|                          |     | (c) If relevant, consider translating estimates of relative risk into absolute risk for a meaningful time period                                                                                             | 34-44      |
| Other analyses           | 17  | Report other analyses done—eg analyses of subgroups and interactions, and sensitivity analyses                                                                                                               |            |
| <b>Discussion</b>        |     |                                                                                                                                                                                                              |            |
| Key results              | 18  | Summarise key results with reference to study objectives                                                                                                                                                     | 08         |
| Limitations              | 19  | Discuss limitations of the study, taking into account sources of potential bias or imprecision. Discuss both direction and magnitude of any potential bias                                                   | 10         |
| Interpretation           | 20  | Give a cautious overall interpretation of results considering objectives, limitations, multiplicity of analyses, results from similar studies, and other relevant evidence                                   | Discussion |
| Generalisability         | 21  | Discuss the generalisability (external validity) of the study results                                                                                                                                        | Discussion |
| <b>Other information</b> |     |                                                                                                                                                                                                              |            |
| Funding                  | 22  | Give the source of funding and the role of the funders for the present study and, if applicable, for the original study on which the present article is based                                                | 03         |

\*Give information separately for exposed and unexposed groups.

**Note:** An Explanation and Elaboration article discusses each checklist item and gives methodological background and published examples of transparent reporting. The STROBE checklist is best used in conjunction with this article (freely available on the Web sites of PLoS Medicine at <http://www.plosmedicine.org/>, Annals of Internal Medicine at <http://www.annals.org/>, and Epidemiology at <http://www.epidem.com/>). Information on the STROBE Initiative is available at <http://www.strobe-statement.org>.



**Sensitivity Analysis Table 1: Demographic distribution comparing the sub-group used in the principal analysis (N = 1638), the same sub-group after the whole sample was weighted by “Administrative zone” and “Family Income”, and the available Manaus city census data.**

| Characteristics <sup>1</sup> | Categories                  | Sample Absolute Frequencies (n) | Sample Percentages (%) | Weighted Sample Percentages (w%) | Manaus City Census Percentages (%) |
|------------------------------|-----------------------------|---------------------------------|------------------------|----------------------------------|------------------------------------|
| <i>Demographics</i>          |                             |                                 |                        |                                  |                                    |
| <b>Age</b>                   | <b>18-29</b>                | 372                             | <b>22·71</b>           | <b>29·27</b>                     | 36·59                              |
|                              | 30-39                       | 420                             | 25·64                  | 23·52                            | 25·89                              |
|                              | 40-49                       | 354                             | 21·61                  | 20·47                            | 17·55                              |
|                              | 50-59                       | 292                             | 17·83                  | 15·60                            | 10·87                              |
|                              | >=60                        | 200                             | 12·21                  | 11·13                            | 9·10                               |
| <b>Sex</b>                   | F                           | 1,031                           | 62·94                  | 63·86                            | 52·07                              |
|                              | M                           | 607                             | 37·06                  | 36·14                            | 47·93                              |
| <b>Race</b>                  | <b>Mestizo</b>              | 885                             | <b>54·03</b>           | <b>59·49</b>                     | <b>67·98</b>                       |
|                              | <b>White</b>                | 602                             | <b>36·75</b>           | <b>30·48</b>                     | <b>26·41</b>                       |
|                              | Black                       | 109                             | 6·65                   | 7·55                             | 4·18                               |
|                              | Indigenous                  | 7                               | 0·43                   | 0·52                             | 0·24                               |
|                              | East-Asian                  | 35                              | 2·14                   | 1·96                             | 1·18                               |
| <b>Marital status</b>        | <b>Married/Stable Union</b> | 748                             | <b>45·86</b>           | <b>40·49</b>                     | 27·05                              |
|                              | Divorced/Widow              | 151                             | 9·26                   | 8·80                             | 6·40                               |
|                              | <b>Single</b>               | 732                             | <b>44·88</b>           | <b>50·71</b>                     | 66·55                              |
| <b>Sexual Orientation</b>    | Heterosexual                | 1,441                           | 89·78                  | 88·58                            | ---                                |
|                              | Homo-/Bi-/Transsexual       | 164                             | 10·22                  | 11·42                            | ---                                |
| <b>Administrative zones</b>  | <b>Center-South</b>         | 581                             | <b>35·47</b>           | <b>11·48</b>                     | <b>9·54</b>                        |
|                              | Center-West                 | 148                             | 9·04                   | 10·23                            | 8·89                               |
|                              | <b>East</b>                 | 163                             | <b>9·95</b>            | <b>18·83</b>                     | <b>23·33</b>                       |
|                              | <b>North</b>                | 274                             | <b>16·73</b>           | <b>26·29</b>                     | <b>26·73</b>                       |
|                              | West                        | 169                             | 10·32                  | 13·46                            | 14·42                              |
|                              | South                       | 303                             | 18·50                  | 19·71                            | 17·10                              |
| <b>Family Income (FI)</b>    | <b>&gt;6 minimum wages</b>  | 731                             | <b>45·57</b>           | <b>26·63</b>                     | <b>22·06</b>                       |
|                              | 4-6 minimum wages           | 390                             | 24·31                  | 27·67                            | 25·69                              |
|                              | <b>0-3 minimum wages</b>    | 483                             | <b>30·11</b>           | <b>45·70</b>                     | <b>52·25</b>                       |
| <b>FI Center-South</b>       | <b>&gt;6 minimum wages</b>  | 371                             | <b>65·32</b>           | <b>57·16</b>                     | <b>52·0</b>                        |
|                              | 4-6 minimum wages           | 113                             | 19·89                  | 17·41                            | 18·0                               |

|                            |                            |              |              |              |              |
|----------------------------|----------------------------|--------------|--------------|--------------|--------------|
|                            | <b>0-3 minimum wages</b>   | 84           | <b>14·79</b> | <b>25·42</b> | <b>30·0</b>  |
| <b>FI Center-West</b>      | <b>&gt;6 minimum wages</b> | 54           | <b>37·76</b> | <b>30·91</b> | <b>30·0</b>  |
|                            | 4-6 minimum wages          | 46           | 32·17        | 30·52        | 27·0         |
|                            | <b>0-3 minimum wages</b>   | 43           | <b>30·07</b> | <b>38·57</b> | <b>43·0</b>  |
| <b>FI East</b>             | <b>&gt;6 minimum wages</b> | 55           | <b>34·38</b> | <b>12·67</b> | <b>9·0</b>   |
|                            | <b>4-6 minimum wages</b>   | 36           | <b>22·50</b> | <b>30·50</b> | <b>26·0</b>  |
|                            | <b>0-3 minimum wages</b>   | 69           | <b>43·13</b> | <b>56·83</b> | <b>65·0</b>  |
| FI North                   | >6 minimum wages           | 62           | 23·13        | 22·21        | 20·0         |
|                            | 4-6 minimum wages          | 78           | 29·10        | 31·08        | 28·0         |
|                            | 0-3 minimum wages          | 128          | 47·76        | 46·72        | 52·0         |
| <b>FI West</b>             | <b>&gt;6 minimum wages</b> | 76           | <b>46·63</b> | <b>26·89</b> | <b>20·0</b>  |
|                            | <b>4-6 minimum wages</b>   | 37           | <b>22·70</b> | <b>27·85</b> | <b>26·0</b>  |
|                            | <b>0-3 minimum wages</b>   | 50           | <b>30·67</b> | <b>45·26</b> | <b>54·0</b>  |
| <b>FI South</b>            | <b>&gt;6 minimum wages</b> | 113          | <b>37·42</b> | <b>25·77</b> | <b>24·0</b>  |
|                            | 4-6 minimum wages          | 80           | 26·49        | 24·85        | 25·0         |
|                            | <b>0-3 minimum wages</b>   | 109          | <b>36·09</b> | <b>49·38</b> | <b>51·0</b>  |
| Healthcare Job             | No                         | 1,380        | 84·25        | 87·43        | ---          |
|                            | Yes                        | 258          | 15·75        | 12·57        | ---          |
| <b>Occupation</b>          | <b>Professional Higher</b> | 974          | <b>60·12</b> | <b>50·28</b> | <b>12·46</b> |
|                            | Professional Middle        | 163          | 10·06        | 12·04        | 56·21        |
|                            | Worker/Informal            | 296          | 18·27        | 22·21        | 18·87        |
|                            | Unemployed                 | 187          | 11·54        | 15·47        | 10·70        |
| <b>Housing</b>             | <b>Apartment</b>           | <b>550</b>   | <b>33·78</b> | <b>23·23</b> | 10·42        |
|                            | Condo/Conjugated           | 303          | 18·61        | 19·34        | 3·95         |
|                            | <b>Detached house</b>      | <b>775</b>   | <b>47·60</b> | <b>57·42</b> | 84·21        |
| Number Adults in residence | 1                          | 156          | 9·59         | 9·16         | ---          |
|                            | 2                          | 633          | 38·91        | 35·66        | ---          |
|                            | 3                          | 419          | 25·75        | 26·30        | ---          |
|                            | 4+                         | 419          | 25·75        | 28·88        | ---          |
| <b>HealthCare Access</b>   |                            |              |              |              |              |
| <b>Private Insurance</b>   | <b>No</b>                  | <b>609</b>   | <b>37·20</b> | <b>46·77</b> | <b>75·87</b> |
|                            | <b>Yes</b>                 | <b>1,028</b> | <b>62·80</b> | <b>53·23</b> | <b>24·13</b> |
| Influenza Vaccine          | Last time 2020             | 806          | 49·21        | 46·22        | ---          |
|                            | Last time 2019             | 371          | 22·65        | 24·00        | ---          |
|                            | Prior to 2019              | 306          | 18·68        | 20·23        | ---          |
|                            | Never                      | 155          | 9·46         | 9·55         | ---          |

<sup>1</sup> Variables obtained at 1<sup>st</sup> Cohort Visit except when indicated.

Distribution changes higher than 5% between unweighted and weighted samples are **showed in Bold**.

**Sensitivity Analysis Table 2: Health and COVID-19 related characteristics comparing the sub-group used in the principal analysis (N = 1638), with the same sub-group after the whole sample was weighted by “Administrative zone” and “Family Income”**

| Characteristics <sup>1</sup>                          | Categories          | Sample Absolute Frequencies (n) | Sample Percentages (%) | Weighted Sample Percentages (w%) |
|-------------------------------------------------------|---------------------|---------------------------------|------------------------|----------------------------------|
| <i><b>Risk Factors</b></i>                            |                     |                                 |                        |                                  |
| Comorbidities (any)                                   | No                  | 967                             | 59.04                  | 59.86                            |
|                                                       | Yes                 | 671                             | 40.96                  | 40.14                            |
| Which Comorbidities                                   | Chronic Respiratory | 152                             | 9.28                   | 8.83                             |
|                                                       | Diabetes            | 91                              | 5.56                   | 5.22                             |
|                                                       | Obesity             | 112                             | 6.84                   | 7.17                             |
|                                                       | Hypertension        | 250                             | 15.26                  | 14.47                            |
|                                                       | Cardiopathy         | 105                             | 6.41                   | 5.87                             |
|                                                       | Chronic Renal       | 30                              | 1.83                   | 2.00                             |
|                                                       | Immunological       | 30                              | 1.83                   | 1.69                             |
|                                                       | Cancer              | 8                               | 0.49                   | 0.32                             |
| Preventive Self medication (any)                      | None/Vit/Homemade   | 1,359                           | 82.97                  | 81.52                            |
|                                                       | Over the counter    | 110                             | 6.72                   | 7.97                             |
|                                                       | Prescription Meds   | 169                             | 10.32                  | 10.52                            |
| <i><b>COVID-19 Exposure</b></i>                       |                     |                                 |                        |                                  |
| Social Distancing before August                       | Never               | 29                              | 1.79                   | 1.82                             |
|                                                       | Sometimes           | 417                             | 25.74                  | 26.96                            |
|                                                       | Frequently          | 1,174                           | 72.47                  | 71.22                            |
| Flexibilization after August                          | No                  | 257                             | 15.86                  | 15.07                            |
|                                                       | Yes                 | 1,363                           | 84.14                  | 84.93                            |
| <b>Work before August</b>                             | On-site             | 479                             | 29.55                  | 30.79                            |
|                                                       | <b>Remote Only</b>  | 780                             | <b>48.12</b>           | <b>41.45</b>                     |
|                                                       | <b>NA</b>           | 362                             | <b>22.33</b>           | <b>27.76</b>                     |
| <b>Work since August</b>                              | On-site             | 765                             | 47.25                  | 51.15                            |
|                                                       | <b>Only Remote</b>  | 580                             | <b>35.82</b>           | <b>28.81</b>                     |
|                                                       | NA                  | 274                             | 16.92                  | 20.04                            |
| Family members with COVID-19 (until 2 <sup>nd</sup> ) | No                  | 495                             | 30.22                  | 30.05                            |
|                                                       | Yes, alive          | 892                             | 54.46                  | 53.89                            |
|                                                       | Yes, deaths         | 251                             | 15.32                  | 16.06                            |

|                                                   |                   |       |       |       |
|---------------------------------------------------|-------------------|-------|-------|-------|
| Household members                                 | No                | 1,261 | 76·98 | 77·60 |
| COVID-19 (until 2 <sup>nd</sup> )                 | Yes, alive        | 371   | 22·65 | 22·03 |
|                                                   | Yes, deaths       | 6     | 0·37  | 0·37  |
| COVID-19 Contacts                                 | None              | 778   | 48·02 | 48·86 |
| (Between 1 <sup>st</sup> - 2 <sup>nd</sup> visit) | Yes, with Mask    | 604   | 37·28 | 36·57 |
|                                                   | Yes, without Mask | 238   | 14·69 | 14·57 |
| <b>COVID-19 Diagnosis</b>                         |                   |       |       |       |
| Symptoms                                          | None              | 1,196 | 73·02 | 72·45 |
| (Between 1 <sup>st</sup> - 2 <sup>nd</sup> visit) | Flu-like          | 393   | 23·99 | 24·43 |
|                                                   | Others            | 49    | 2·99  | 3·12  |
| PCR (Between                                      | Not done          | 1,487 | 92·13 | 93·87 |
| 1 <sup>st</sup> - 2 <sup>nd</sup> visit)          | Yes, Negative     | 79    | 4·89  | 3·59  |
|                                                   | Yes, Positive     | 48    | 2·97  | 2·54  |
| Serology (Between                                 | Not done          | 1,030 | 63·74 | 66·46 |
| 1 <sup>st</sup> - 2 <sup>nd</sup> visit)          | Yes, Negative     | 531   | 32·86 | 29·91 |
|                                                   | Yes, Positive     | 55    | 3·40  | 3·63  |
| Antigenic Test                                    | Not done          | 1,088 | 98·64 | 98·83 |
| (Between 1 <sup>st</sup> - 2 <sup>nd</sup> visit) | Yes, Negative     | 9     | 0·82  | 0·69  |
|                                                   | Yes, Positive     | 6     | 0·54  | 0·48  |
| COVID-19 Diagnosis                                | No                | 1,538 | 93·95 | 93·92 |
| (Between 1 <sup>st</sup> - 2 <sup>nd</sup> visit) | Yes               | 99    | 6·05  | 6·08  |

<sup>1</sup> Variables obtained at 1<sup>st</sup> Cohort Visit except when indicated.

Vit: Vitamins· NA: Not applicable· PCR: Polymerase Chain Reaction Test.

Distribution changes higher than 5% between unweighted and weighted samples are **showed in Bold**.

**Sensitivity Analysis Table 3: SARS-CoV-2 seroconversion incidence and crude Poisson regression models according to demographics comparing the sub-group used in the principal analysis, and the same sub-group after the whole sample was weighted by “Administrative zone” and “Family Income”**

| Characteristics <sup>1</sup> | Categories            | IgG ELISA (-) -> (+) | Sample Incidence row % | Chi2 test p value | Weighted Incidence row % | Chi2 test p value | IRR*        | 95%CI            | p value      | Weight IRR* | 95%CI            | p value      |
|------------------------------|-----------------------|----------------------|------------------------|-------------------|--------------------------|-------------------|-------------|------------------|--------------|-------------|------------------|--------------|
| <b>Total</b>                 |                       | 214                  | 13·06                  |                   | 13·39                    |                   |             |                  |              |             |                  |              |
| <i>Demographics</i>          |                       |                      |                        |                   |                          |                   |             |                  |              |             |                  |              |
| <b>Age</b>                   | 18-29                 | 48                   | 12·90                  | 0·915             | 13·21                    | 0·784             | Ref         | -----            | -----        |             |                  |              |
|                              | <b>30-39</b>          | 56                   | <b>13·33</b>           |                   | <b>15·22</b>             |                   | <b>1·03</b> | <b>0·68-1·57</b> | <b>0·878</b> | <b>1·12</b> | <b>0·75-1·68</b> | <b>0·584</b> |
|                              | 40-49                 | 48                   | 13·56                  |                   | 12·66                    |                   | 1·05        | 0·81-1·36        | 0·703        | 0·94        | 0·63-1·40        | 0·752        |
|                              | 50-59                 | 40                   | 13·70                  |                   | 13·38                    |                   | 1·06        | 0·69-1·63        | 0·786        | 0·99        | 0·53-1·84        | 0·969        |
|                              | >=60                  | 22                   | 11·00                  |                   | 11·32                    |                   | 0·85        | 0·37-1·99        | 0·712        | 0·82        | 0·29-2·36        | 0·713        |
| <b>Sex</b>                   | F                     | 130                  | 12·61                  | 0·476             | 12·06                    | 0·339             | Ref         | -----            | -----        |             |                  |              |
|                              | <b>M</b>              | 84                   | <b>13·84</b>           |                   | <b>15·73</b>             |                   | <b>1·10</b> | <b>0·75-1·60</b> | <b>0·627</b> | <b>1·28</b> | <b>0·79-2·07</b> | <b>0·323</b> |
| <b>Race</b>                  | Mestizo               | 125                  | 14·12                  | 0·290             | 13·12                    | 0·119             | Ref         | -----            | -----        |             |                  |              |
|                              | <b>White</b>          | 74                   | <b>12·29</b>           |                   | <b>15·44</b>             |                   | <b>0·87</b> | <b>0·57-1·32</b> | <b>0·515</b> | <b>1·21</b> | <b>0·90-1·61</b> | <b>0·205</b> |
|                              | <b>Black</b>          | 9                    | <b>8·26</b>            |                   | <b>4·29</b>              |                   | <b>0·58</b> | <b>0·12-2·81</b> | <b>0·503</b> | <b>0·33</b> | <b>0·07-1·55</b> | <b>0·162</b> |
|                              | Indigenous            | 0                    | 0·00                   |                   | 0·00                     |                   | NA          |                  |              | NA          |                  |              |
|                              | <b>East-Asian</b>     | 6                    | <b>17·14</b>           |                   | <b>28·18</b>             |                   | <b>1·21</b> | <b>0·51-2·90</b> | <b>0·663</b> | <b>2·22</b> | <b>0·94-5·24</b> | <b>0·069</b> |
| Marital status               | Married/Stable Union  | 97                   | 12·97                  | 0·593             | 13·73                    | 0·731             | Ref         | -----            | -----        |             |                  |              |
|                              | Divorced/Widow        | 16                   | 10·61                  |                   | 10·64                    |                   | 0·82        | 0·52-1·28        | 0·378        | 0·79        | 0·46-1·37        | 0·396        |
|                              | Single                | 100                  | 13·66                  |                   | 13·57                    |                   | 1·05        | 0·80-1·38        | 0·708        | 1·01        | 0·70-1·45        | 0·952        |
| Sexual Orientation           | Heterosexual          | 182                  | 12·63                  | 0·167             | 12·63                    | 0·282             | Ref         | -----            | -----        |             |                  |              |
|                              | Homo-/Bi-/Transsexual | 27                   | 16·46                  |                   | 18·87                    |                   | 1·30        | 0·84-2·02        | 0·234        | 1·52        | 0·81-2·86        | 0·197        |
| Occupation                   | Professional Higher   | 121                  | 12·42                  | 0·667             | 12·38                    | 0·518             | Ref         | -----            | -----        |             |                  |              |
|                              | Professional Middle   | 22                   | 13·50                  |                   | 13·84                    |                   | 1·08        | 0·59-2·00        | 0·790        | 1·09        | 0·60-1·98        | 0·769        |
|                              | Worker/Informal       | 45                   | 15·20                  |                   | 15·74                    |                   | 1·22        | 0·94-1·60        | 0·136        | 1·24        | 0·91-1·68        | 0·180        |
|                              | Unemployed            | 25                   | 13·37                  |                   | 13·37                    |                   | 1·08        | 0·81-1·44        | 0·618        | 1·11        | 0·79-1·57        | 0·550        |
| Healthcare Job               | No                    | 179                  | 12·97                  | 0·795             | 13·25                    | 0·520             | Ref         | -----            | -----        |             |                  |              |
|                              | Yes                   | 35                   | 13·57                  |                   | 14·32                    |                   | 1·05        | 0·73-1·50        | 0·807        | 1·05        | 0·83-1·32        | 0·696        |
| Family Income                | >6 minimum wages      | 96                   | 13·13                  | 0·713             | 13·61                    | 0·646             | Ref         | -----            | -----        |             |                  |              |
|                              | 4-6 minimum wages     | 55                   | 14·10                  |                   | 14·39                    |                   | 1·07        | 0·79-1·46        | 0·647        | 1·08        | 0·71-1·64        | 0·724        |
|                              | 0-3 minimum wages     | 59                   | 12·22                  |                   | 12·77                    |                   | 0·93        | 0·77-1·13        | 0·466        | 0·95        | 0·82-1·10        | 0·486        |
| Housing                      | Apartment             | 71                   | 12·91                  | 0·438             | 14·08                    | 0·305             | Ref         | -----            | -----        |             |                  |              |
|                              | Condo/Conjugated      | 46                   | 15·18                  |                   | 16·32                    |                   | 1·18        | 0·98-1·42        | 0·089        | 1·13        | 0·90-1·40        | 0·290        |

|                            |                |           |              |       |              |        |             |                  |              |             |                  |              |
|----------------------------|----------------|-----------|--------------|-------|--------------|--------|-------------|------------------|--------------|-------------|------------------|--------------|
|                            | Detached house | 95        | 12·26        |       | 12·18        |        | 0·95        | 0·71-1·27        | 0·724        | 0·85        | 0·57-1·26        | 0·410        |
| Number Adults in residence | 1              | 22        | 14·10        | 0·883 | 14·13        | 0·621  | Ref         | -----            | -----        |             |                  |              |
|                            | 2              | 86        | 13·59        |       | 14·35        |        | 0·96        | 0·65-1·43        | 0·852        | 1·00        | 0·66-1·51        | 0·997        |
|                            | 3              | 53        | 12·65        |       | 14·18        |        | 0·90        | 0·59-1·37        | 0·614        | 1·00        | 0·59-1·70        | 0·992        |
|                            | 4+             | 51        | 12·17        |       | 11·32        |        | 0·86        | 0·64-1·16        | 0·336        | 0·81        | 0·50-1·33        | 0·411        |
| Administrative zones       | Center-South   | 61        | 10·50        | 0·015 | 10·40        | <0·001 | NA          |                  |              | NA          |                  |              |
|                            | Center-West    | 24        | 16·22        |       | 16·38        |        | NA          |                  |              | NA          |                  |              |
|                            | East           | 22        | 13·50        |       | 13·05        |        | NA          |                  |              | NA          |                  |              |
|                            | North          | 28        | 10·22        |       | 10·36        |        | NA          |                  |              | NA          |                  |              |
|                            | West           | 33        | 19·53        |       | 18·07        |        | NA          |                  |              | NA          |                  |              |
|                            | South          | 46        | 15·18        |       | 14·75        |        | NA          |                  |              | NA          |                  |              |
| <i>HealthCare Access</i>   |                |           |              |       |              |        |             |                  |              |             |                  |              |
| Private Insurance          | No             | 89        | 14·61        | 0·154 | 14·16        | 0·546  | Ref         | -----            | -----        |             |                  |              |
|                            | Yes            | 125       | 12·16        |       | 12·74        |        | 0·83        | 0·59-1·18        | 0·302        | 0·90        | 0·66-1·23        | 0·512        |
| <b>Influenza Vaccine</b>   | Last time 2020 | 96        | 11·91        | 0·128 | 12·54        | 0·644  | Ref         | -----            | -----        |             |                  |              |
|                            | Last time 2019 | 62        | 16·71        |       | 15·75        |        | 1·40        | 0·98-2·01        | 0·065        | 1·25        | 0·90-1·72        | 0·185        |
|                            | Prior to 2019  | 38        | 12·42        |       | 12·20        |        | 1·04        | 0·66-1·64        | 0·857        | 0·96        | 0·66-1·38        | 0·810        |
|                            | <b>Never</b>   | <b>18</b> | <b>11·61</b> |       | <b>14·10</b> |        | <b>0·98</b> | <b>0·57-1·68</b> | <b>0·928</b> | <b>1·13</b> | <b>0·52-2·48</b> | <b>0·755</b> |

<sup>1</sup> Variables obtained at 1<sup>st</sup> Cohort Visit except when indicated.

\* Incidence Rate Ratio (IRR) using Poisson Regression considering follow-up time with robust variance corrected by clusters.

Incidence changes higher than one standard error between unweighted and weighted samples are **showed in Bold**.

**Sensitivity Analysis Table 4: SARS-CoV-2 seroconversion incidence and crude Poisson regression models according to health and COVID-19 related characteristics comparing the sub-group used in the principal analysis, and the same sub-group after the whole sample was weighted by “Administrative zone” and “Family Income”**

| Characteristics <sup>1</sup>                       | Variables               | IgG ELISA (-) -> (+) | Sample Incidence row % | Chi2 test p value | Weighted Incidence row % | Chi2 test p value | IRR*        | 95%CI            | p value      | Weight IRR* | 95%CI            | p value      |
|----------------------------------------------------|-------------------------|----------------------|------------------------|-------------------|--------------------------|-------------------|-------------|------------------|--------------|-------------|------------------|--------------|
| <b>Total</b>                                       |                         | 214                  | 13.06                  |                   | 13.39                    |                   |             |                  |              |             |                  |              |
| <i><b>Risk Factors</b></i>                         |                         |                      |                        |                   |                          |                   |             |                  |              |             |                  |              |
| <b>Comorbidities (any)</b>                         | No                      | 130                  | 13.44                  | 0.585             | 13.39                    | 0.998             | Ref         | -----            | -----        |             |                  |              |
|                                                    | <b>Yes</b>              | 84                   | <b>12.52</b>           |                   | <b>13.39</b>             |                   | <b>0.93</b> | <b>0.66-1.31</b> | <b>0.683</b> | <b>1.01</b> | <b>0.72-1.41</b> | <b>0.968</b> |
| Which Comorbidities                                | Chronic Respiratory     | 25                   | 16.45                  |                   | 16.97                    |                   | NA          |                  |              | NA          |                  |              |
|                                                    | Diabetes                | 14                   | 15.38                  |                   | 15.79                    |                   | NA          |                  |              | NA          |                  |              |
|                                                    | Obesity                 | 19                   | 16.96                  |                   | 19.35                    |                   | NA          |                  |              | NA          |                  |              |
|                                                    | Hypertension            | 28                   | 11.20                  |                   | 11.85                    |                   | NA          |                  |              | NA          |                  |              |
|                                                    | Cardiopathy             | 11                   | 10.48                  |                   | 12.57                    |                   | NA          |                  |              | NA          |                  |              |
|                                                    | Chronic Renal           | 6                    | 20.00                  |                   | 19.66                    |                   | NA          |                  |              | NA          |                  |              |
|                                                    | Immunological           | 6                    | 20.00                  |                   | 18.24                    |                   | NA          |                  |              | NA          |                  |              |
|                                                    | Cancer                  | 0                    | 0.00                   |                   | 0.00                     |                   | NA          |                  |              | NA          |                  |              |
| <b>Preventive Self medication (any)</b>            | None/Vit/Homemade       | 168                  | 12.36                  | 0.140             | 12.06                    | 0.111             | Ref         | -----            | -----        |             |                  |              |
|                                                    | <b>Over the counter</b> | 20                   | <b>18.18</b>           |                   | <b>21.94</b>             |                   | <b>1.47</b> | <b>0.90-2.40</b> | <b>0.122</b> | <b>1.83</b> | <b>0.95-3.55</b> | <b>0.071</b> |
|                                                    | Prescription Meds       | 26                   | 15.38                  |                   | 17.20                    |                   | 1.24        | 0.91-1.70        | 0.166        | 1.45        | 1.16-1.81        | 0.001        |
| <i><b>COVID-19 Exposure</b></i>                    |                         |                      |                        |                   |                          |                   |             |                  |              |             |                  |              |
| Social Distancing before August                    | Never                   | 7                    | 24.14                  | 0.183             | 25.13                    | 0.357             | Ref         | -----            | -----        |             |                  |              |
|                                                    | Sometimes               | 51                   | 12.23                  |                   | 12.16                    |                   | 0.51        | 0.36-0.72        | <0.001       | 0.48        | 0.30-0.77        | 0.002        |
|                                                    | Frequently              | 153                  | 13.03                  |                   | 13.54                    |                   | 0.54        | 0.33-0.88        | 0.014        | 0.54        | 0.27-1.08        | 0.083        |
| Flexibilization August                             | No                      | 24                   | 9.34                   | 0.056             | 9.64                     | 0.027             | Ref         | -----            | -----        |             |                  |              |
|                                                    | Yes                     | 187                  | 13.72                  |                   | 14.04                    |                   | 1.47        | 1.14-1.89        | 0.003        | 1.48        | 1.16-1.90        | 0.002        |
| Work before August                                 | On-site                 | 79                   | 16.49                  | 0.014             | 17.34                    | 0.106             | Ref         | -----            | -----        |             |                  |              |
|                                                    | Remote Only             | 96                   | 12.31                  |                   | 12.20                    |                   | 0.75        | 0.55-1.01        | 0.058        | 0.71        | 0.46-1.10        | 0.123        |
|                                                    | NA                      | 36                   | 9.94                   |                   | 10.72                    |                   |             |                  |              |             |                  |              |
| Work since August                                  | On-site                 | 105                  | 13.73                  | 0.161             | 14.75                    | 0.049             | Ref         | -----            | -----        |             |                  |              |
|                                                    | Only Remote             | 80                   | 13.79                  |                   | 13.40                    |                   | 1.00        | 0.84-1.20        | 0.957        | 0.89        | 0.70-1.13        | 0.347        |
|                                                    | NA                      | 26                   | 9.49                   |                   | 9.86                     |                   |             |                  |              |             |                  |              |
| Family members with COVID-19 (at 2 <sup>nd</sup> ) | No                      | 54                   | 10.91                  | 0.228             | 12.14                    | 0.402             | Ref         | -----            | -----        |             |                  |              |
|                                                    | Yes, alive              | 126                  | 14.13                  |                   | 14.28                    |                   | 1.29        | 1.11-1.51        | 0.001        | 1.18        | 0.89-1.56        | 0.256        |
|                                                    | Yes, deaths             | 34                   | 13.55                  |                   | 12.74                    |                   | 1.24        | 0.97-1.59        | 0.087        | 1.04        | 0.68-1.58        | 0.856        |



|                                                      |                       |     |              |         |              |         |             |                  |                  |             |                  |                  |
|------------------------------------------------------|-----------------------|-----|--------------|---------|--------------|---------|-------------|------------------|------------------|-------------|------------------|------------------|
| Household members                                    | No                    | 127 | 10·07        | <0·001* | 10·91        | 0·003   | Ref         | -----            | -----            |             |                  |                  |
| COVID-19 (at 2 <sup>nd</sup> )                       | Yes, alive            | 85  | 22·91        |         | 21·79        |         | 2·27        | 1·78-2·91        | <0·001           | 2·01        | 1·60-2·52        | <0·001           |
|                                                      | Yes, deaths           | 2   | 33·33        |         | 32·39        |         | 3·31        | 0·86-12·7        | 0·081            | 3·07        | 0·92-10·3        | 0·069            |
| <b>COVID-19 Contacts</b>                             | None                  | 70  | 9·00         | <0·001  | 8·99         | <0·001  | Ref         | -----            | -----            |             |                  |                  |
| <b>Since August</b>                                  | <b>Yes, with Mask</b> | 93  | <b>15·40</b> |         | <b>17·00</b> |         | <b>1·71</b> | <b>1·36-2·16</b> | <b>&lt;0·001</b> | <b>1·91</b> | <b>1·64-2·22</b> | <b>&lt;0·001</b> |
|                                                      | Yes, without Mask     | 48  | 20·17        |         | 18·99        |         | 2·24        | 1·93-2·61        | <0·001           | 2·17        | 1·71-2·75        | <0·001           |
| <b>COVID-19 Diagnosis</b>                            |                       |     |              |         |              |         |             |                  |                  |             |                  |                  |
| <b>Symptoms</b>                                      | None                  | 103 | 8·61         | <0·001  | 9·03         | <0·001  | Ref         | -----            | -----            |             |                  |                  |
| <b>(Between 1<sup>st</sup> 2<sup>nd</sup> visit)</b> | Flu-like              | 104 | 26·46        |         | 26·76        |         | 3·07        | 2·25-4·19        | <0·001           | 2·97        | 2·00-4·39        | <0·001           |
|                                                      | <b>Others</b>         | 7   | <b>14·29</b> |         | <b>9·86</b>  |         | <b>1·66</b> | <b>0·67-4·14</b> | <b>0·277</b>     | <b>1·09</b> | <b>0·42-2·84</b> | <b>0·861</b>     |
| <b>PCR (Between</b>                                  | Not done              | 161 | 10·83        | <0·001  | 11·35        | <0·001  | Ref         | -----            | -----            |             |                  |                  |
| <b>1<sup>st</sup> 2<sup>nd</sup> visit)</b>          | <b>Yes, Negative</b>  | 11  | <b>13·92</b> |         | <b>17·97</b> |         | <b>1·29</b> | <b>0·85-1·96</b> | <b>0·240</b>     | <b>1·59</b> | <b>0·88-2·86</b> | <b>0·121</b>     |
|                                                      | Yes, Positive         | 36  | 75·00        |         | 72·92        |         | 6·93        | 5·54-8·66        | <0·001           | 6·30        | 4·92-8·07        | <0·001           |
| <b>Serology (Between</b>                             | Not done              | 116 | 11·26        | <0·001  | 11·52        | <0·001  | Ref         | -----            | -----            |             |                  |                  |
| <b>1<sup>st</sup> 2<sup>nd</sup> visit)</b>          | <b>Yes, Negative</b>  | 63  | <b>11·86</b> |         | <b>13·38</b> |         | <b>1·05</b> | <b>0·77-1·44</b> | <b>0·743</b>     | <b>1·19</b> | <b>0·85-1·67</b> | <b>0·301</b>     |
|                                                      | <b>Yes, Positive</b>  | 32  | <b>58·18</b> |         | <b>48·20</b> |         | <b>5·17</b> | <b>3·31-8·06</b> | <b>&lt;0·001</b> | <b>4·12</b> | <b>2·17-7·81</b> | <b>&lt;0·001</b> |
| Antigenic Test                                       | Not done              | 124 | 11·40        | <0·001† | 11·57        | <0·001† | Ref         | -----            | -----            |             |                  |                  |
| <b>(Between 1<sup>st</sup> 2<sup>nd</sup> visit)</b> | Yes, Negative         | 1   | 11·11        |         | 17·35        |         | 0·97        | 0·15-6·50        | 0·979            | 1·75        | 0·31-9·88        | 0·527            |
|                                                      | Yes, Positive         | 6   | 100·00       |         | 100·00       |         | 8·77        | 6·61-11·7        | <0·001           | 8·91        | 6·43-12·3        | <0·001           |
| <b>COVID-19 (Between</b>                             | <b>No</b>             | 151 | <b>9·82</b>  | <0·001  | <b>10·60</b> | <0·001  | <b>Ref</b>  | -----            | -----            |             |                  |                  |
| <b>1<sup>st</sup> 2<sup>nd</sup> visit)</b>          | <b>Yes</b>            | 63  | <b>63·64</b> |         | <b>56·61</b> |         | <b>6·48</b> | <b>4·24-9·90</b> | <b>&lt;0·001</b> | <b>5·19</b> | <b>3·46-7·77</b> | <b>&lt;0·001</b> |

<sup>1</sup> Variables obtained at 1<sup>st</sup> Cohort Visit except when indicated.

\* Incidence Rate Ratio (IRR) using Poisson Regression considering follow-up time with robust variance corrected by clusters.

† Fisher's Exact Test.

Incidence changes higher than one standard error between unweighted and weighted samples are **showed in Bold**.

**Sensitivity Analysis Table 5: SARS-CoV-2 seroconversion Multivariate Poisson regression models comparing the sub-group used in the principal analysis, and the same sub-group after the whole sample was weighted by “Administrative zone” and “Family Income”**

| Characteristics <sup>1</sup>                          | Variables                | IRR*        | 95%CI            | p value      | Weighted IRR* | Weighted 95%CI   | p value      | Wald test †<br>Between Coefficients<br>p value |
|-------------------------------------------------------|--------------------------|-------------|------------------|--------------|---------------|------------------|--------------|------------------------------------------------|
| Age                                                   | 18-29                    | Ref         | -----            | -----        |               |                  |              |                                                |
|                                                       | 30-39                    | 0.97        | 0.68-1.37        | 0.854        | 1.05          | 0.74-1.50        | 0.770        | 0.736                                          |
|                                                       | 40-49                    | 1.05        | 0.81-1.36        | 0.725        | 0.91          | 0.63-1.32        | 0.623        | 0.546                                          |
|                                                       | 50-59                    | 1.13        | 0.66-1.93        | 0.652        | 1.18          | 0.57-2.41        | 0.658        | 0.931                                          |
|                                                       | >=60                     | 1.17        | 0.55-2.51        | 0.683        | 1.13          | 0.39-3.24        | 0.821        | 0.955                                          |
| Sex                                                   | F                        | Ref         | -----            | -----        |               |                  |              |                                                |
|                                                       | M                        | 1.13        | 0.82-1.56        | 0.458        | 1.36          | 0.80-2.31        | 0.254        | 0.556                                          |
| Social Distancing<br>before August                    | Never                    | Ref         | -----            | -----        |               |                  |              |                                                |
|                                                       | Sometimes                | 0.80        | 0.53-1.21        | 0.285        | 0.83          | 0.48-1.44        | 0.502        | 0.922                                          |
|                                                       | Frequently               | 1.11        | 0.57-2.18        | 0.758        | 1.20          | 0.52-2.74        | 0.673        | 0.895                                          |
| <b>SD Flexibilization</b>                             | No                       | Ref         | -----            | -----        |               |                  |              |                                                |
|                                                       | <b>Yes</b>               | <b>1.31</b> | <b>1.05-1.64</b> | <b>0.017</b> | <b>1.32</b>   | <b>0.97-1.81</b> | <b>0.078</b> | <b>0.963</b>                                   |
| <b>Motives Work before<br/>August</b>                 | On-site                  | Ref         | -----            | -----        |               |                  |              |                                                |
|                                                       | <b>Remote Only</b>       | <b>0.74</b> | <b>0.56-0.97</b> | <b>0.030</b> | <b>0.72</b>   | <b>0.49-1.06</b> | <b>0.098</b> | <b>0.927</b>                                   |
|                                                       | NA                       |             |                  |              |               |                  |              |                                                |
| Household members<br>with COVID-19 (2 <sup>nd</sup> ) | No                       | Ref         | -----            | -----        |               |                  |              |                                                |
|                                                       | Yes, alive               | 1.49        | 1.21-1.83        | <0.001       | 1.41          | 1.12-1.78        | 0.003        | 0.739                                          |
|                                                       | Yes, deaths              | 2.22        | 0.68-7.27        | 0.186        | 1.82          | 0.86-3.88        | 0.120        | 0.781                                          |
| <b>COVID-19 Contacts<br/>since August</b>             | None                     | Ref         | -----            | -----        |               |                  |              |                                                |
|                                                       | <b>Yes, with Mask</b>    | <b>1.20</b> | <b>0.90-1.60</b> | <b>0.219</b> | <b>1.39</b>   | <b>1.15-1.69</b> | <b>0.001</b> | <b>0.402</b>                                   |
|                                                       | <b>Yes, without Mask</b> | <b>1.25</b> | <b>1.09-1.45</b> | <b>0.002</b> | <b>1.30</b>   | <b>0.95-1.76</b> | <b>0.096</b> | <b>0.851</b>                                   |
| Symptoms since<br>August                              | None                     | Ref         | -----            | -----        |               |                  |              |                                                |
|                                                       | Flu-like                 | 1.79        | 1.23-2.59        | 0.002        | 1.98          | 1.20-3.27        | 0.008        | 0.752                                          |
|                                                       | Others                   | 1.20        | 0.60-2.40        | 0.616        | 0.85          | 0.28-2.61        | 0.776        | 0.613                                          |
| COVID-19 Diagnosis<br>since August                    | No                       | Ref         | -----            | -----        |               |                  |              |                                                |
|                                                       | Yes                      | 3.57        | 2.27-5.63        | <0.001       | 2.94          | 2.12-4.10        | <0.001       | 0.499                                          |

<sup>1</sup> Variables obtained at 1st Cohort Visit except when indicated.

\* Incidence Rate Ratio (IRR) using Poisson Regression considering follow-up time with robust variance corrected by clusters, and adjusted per all model variables.

† Wald test comparing regression coefficients for each category of the unweighted and weighted models.

Variables and categories who lost statistical significance after weighting are **showed in Bold**.
